# Supplementary material for: Comprehensive Assessment of the Stability of Selected Coxibs in Variable Environmental Conditions along with the Assessment of Their Potential Hepatotoxicity
Source: MDPI journal article supplement (doi:10.3390/pharmaceutics15112609), 2023-11-09
Supplement: s1 [file s1]

Supplementary information

# Comprehensive Assessment of the Stability of Selected Coxibs in Variable Environmental Conditions along with the Assessment of Their Potential Hepatotoxicity

Paweł Gumułka, Łukasz Pecio, Paweł Żmudzki, Krzesimir Ciura, Krystyna Skalicka-Woźniak, Monika Dąbrowska and Małgorzata Starek

**Table S1.** Results of coxibs degradation under different stress conditions at room temperature (23 °C).

| Environment      | Time [day] | Concentration [%] |       |       |       |       |
|------------------|------------|-------------------|-------|-------|-------|-------|
|                  |            | ROB               | CIM   | FIR   | ETO   | CEL   |
| 1M HCl           | 0          | 7.63              | 34.45 | 32.67 | 4.88  | 36.04 |
|                  | 30         | 0.00              | 3.68  | 11.74 | 0.00  | 0.00  |
|                  | 60         | 0.00              | 0.00  | 1.98  | 0.00  | 0.00  |
|                  | 90         | 0.00              | 0.00  | 0.00  | 0.00  | 0.00  |
| 0.5M HCl         | 0          | 11.57             | 73.82 | 47.59 | 12.05 | 58.79 |
|                  | 30         | 0.00              | 8.22  | 7.72  | 0.00  | 3.09  |
|                  | 60         | 0.00              | 6.54  | 2.84  | 0.00  | 0.00  |
|                  | 90         | 0.00              | 0.00  | 0.00  | 0.00  | 0.00  |
| H <sub>2</sub> O | 0          | 99.86             | 98.94 | 94.10 | 98.96 | 91.26 |
|                  | 30         | 16.36             | 51.81 | 51.26 | 56.65 | 56.67 |
|                  | 60         | 0.00              | 46.12 | 12.30 | 49.47 | 22.26 |
|                  | 90         | 0.00              | 42.57 | 0.00  | 40.32 | 9.87  |
| 0.5M NaOH        | 0          | 88.88             | 77.64 | 94.07 | 99.67 | 99.92 |
|                  | 30         | 50.72             | 66.29 | 58.86 | 62.54 | 82.35 |
|                  | 60         | 27.77             | 53.04 | 33.15 | 46.30 | 63.45 |
|                  | 90         | 14.60             | 48.19 | 24.38 | 36.82 | 48.28 |
| 1M NaOH          | 0          | 79.30             | 86.18 | 83.69 | 89.97 | 86.29 |
|                  | 30         | 38.93             | 51.04 | 41.28 | 55.46 | 59.26 |
|                  | 60         | 21.06             | 32.48 | 24.58 | 33.88 | 39.95 |
|                  | 90         | 10.23             | 13.31 | 9.55  | 23.28 | 16.67 |
| buffer pH 2.0    | 0          | 36.30             | 84.29 | 65.26 | 66.57 | 73.75 |
|                  | 30         | 1.50              | 46.22 | 43.72 | 9.24  | 23.89 |
|                  | 60         | 0.00              | 32.78 | 6.49  | 0.00  | 5.28  |
|                  | 90         | 0.00              | 16.12 | 0.00  | 0.00  | 0.00  |
| buffer pH 7.0    | 0          | 89.05             | 98.64 | 99.73 | 82.62 | 92.18 |
|                  | 30         | 59.96             | 83.58 | 43.39 | 70.92 | 59.01 |
|                  | 60         | 44.77             | 72.52 | 38.78 | 59.93 | 14.29 |
|                  | 90         | 21.99             | 67.79 | 16.94 | 48.25 | 0.00  |
| buffer pH 9.2    | 0          | 98.57             | 99.89 | 84.89 | 87.72 | 91.03 |
|                  | 30         | 80.40             | 52.90 | 60.34 | 77.54 | 66.88 |
|                  | 60         | 65.98             | 44.73 | 41.99 | 55.67 | 53.22 |
|                  | 90         | 58.57             | 42.40 | 22.51 | 49.06 | 42.69 |

**Table S2.** Results of coxibs degradation under different stress conditions at 70 °C.

| Environment      | Time [day] | Concentration [%] |       |       |       |       |
|------------------|------------|-------------------|-------|-------|-------|-------|
|                  |            | ROB               | CIM   | FIR   | ETO   | CEL   |
| 1M HCl           | 0          | 7.63              | 34.45 | 32.67 | 4.88  | 36.04 |
|                  | 3          | 0.00              | 32.69 | 11.11 | 0.00  | 0.00  |
|                  | 7          | 0.00              | 9.65  | 0.00  | 0.00  | 0.00  |
|                  | 16         | 0.00              | 8.06  | 0.00  | 0.00  | 0.00  |
| 0.5M HCl         | 0          | 11.57             | 73.82 | 47.59 | 12.05 | 58.79 |
|                  | 3          | 0.00              | 34.17 | 19.99 | 4.08  | 6.58  |
|                  | 7          | 0.00              | 17.76 | 0.00  | 0.00  | 0.00  |
|                  | 16         | 0.00              | 10.95 | 0.00  | 0.00  | 0.00  |
| H <sub>2</sub> O | 0          | 99.86             | 98.94 | 94.10 | 98.96 | 91.26 |
|                  | 3          | 30.94             | 65.57 | 18.49 | 72.61 | 59.00 |
|                  | 7          | 10.37             | 51.55 | 11.89 | 64.78 | 43.29 |
|                  | 16         | 0.00              | 48.82 | 0.00  | 45.07 | 29.94 |
| 0.5M NaOH        | 0          | 88.88             | 77.64 | 94.07 | 99.67 | 99.92 |
|                  | 3          | 56.10             | 71.61 | 65.06 | 78.95 | 79.17 |
|                  | 7          | 42.48             | 65.10 | 59.42 | 72.75 | 64.79 |
|                  | 16         | 11.89             | 55.14 | 51.06 | 69.21 | 45.96 |
| 1M NaOH          | 0          | 79.30             | 86.18 | 83.69 | 89.97 | 86.29 |
|                  | 3          | 50.43             | 74.23 | 65.23 | 76.26 | 68.83 |
|                  | 7          | 22.52             | 44.45 | 52.79 | 63.27 | 61.26 |
|                  | 16         | 5.95              | 30.57 | 39.32 | 52.09 | 40.05 |
| buffer pH 2.0    | 0          | 36.30             | 84.29 | 65.26 | 66.57 | 73.75 |
|                  | 3          | 1.50              | 51.65 | 40.87 | 49.58 | 8.32  |
|                  | 7          | 0.00              | 45.22 | 10.58 | 32.27 | 0.00  |
|                  | 16         | 0.00              | 34.93 | 0.00  | 8.85  | 0.00  |
| buffer pH 7.0    | 0          | 89.05             | 98.64 | 99.73 | 82.62 | 92.18 |
|                  | 3          | 65.98             | 79.66 | 54.21 | 78.31 | 66.86 |
|                  | 7          | 36.08             | 73.48 | 34.79 | 67.89 | 52.69 |
|                  | 16         | 10.10             | 62.12 | 17.29 | 63.40 | 40.51 |
| buffer pH 9.2    | 0          | 98.57             | 99.89 | 84.89 | 87.72 | 91.03 |
|                  | 3          | 95.05             | 74.71 | 67.69 | 79.89 | 56.39 |
|                  | 7          | 81.18             | 59.12 | 59.14 | 68.66 | 54.97 |
|                  | 16         | 59.92             | 45.42 | 56.22 | 58.19 | 43.50 |

**Table S3.** Results of coxibs degradation under different stress conditions at 120 °C.

| Environment      | Time [day] | Concentration [%] |       |       |       |       |
|------------------|------------|-------------------|-------|-------|-------|-------|
|                  |            | ROB               | CIM   | FIR   | ETO   | CEL   |
| 1M HCl           | 0          | 7.63              | 34.45 | 32.67 | 4.88  | 36.04 |
|                  | 2          | 0.00              | 26.67 | 13.63 | 0.00  | 17.49 |
|                  | 8          | 0.00              | 22.63 | 2.33  | 0.00  | 7.66  |
|                  | 24         | 0.00              | 13.90 | 0.00  | 0.00  | 2.81  |
|                  | 80         | 0.00              | 8.35  | 0.00  | 0.00  | 0.00  |
|                  | 130        | 0.00              | 5.78  | 0.00  | 0.00  | 0.00  |
| 0.5M HCl         | 0          | 11.57             | 76.82 | 47.59 | 12.05 | 58.79 |
|                  | 2          | 0.00              | 55.95 | 16.68 | 6.74  | 22.53 |
|                  | 8          | 0.00              | 50.03 | 3.83  | 5.14  | 15.14 |
|                  | 24         | 0.00              | 43.52 | 0.00  | 3.25  | 7.63  |
|                  | 80         | 0.00              | 39.41 | 0.00  | 0.00  | 0.00  |
|                  | 130        | 0.00              | 32.09 | 0.00  | 0.00  | 0.00  |
| H <sub>2</sub> O | 0          | 99.86             | 98.94 | 95.10 | 98.96 | 91.26 |
|                  | 2          | 58.93             | 92.10 | 69.02 | 81.86 | 81.53 |
|                  | 8          | 29.42             | 86.16 | 43.65 | 77.50 | 68.01 |
|                  | 24         | 12.96             | 85.46 | 24.77 | 66.88 | 52.87 |
|                  | 80         | 0.00              | 71.85 | 6.42  | 64.16 | 31.18 |
|                  | 130        | 0.00              | 66.25 | 0.00  | 54.86 | 22.14 |
| 0.5M NaOH        | 0          | 88.88             | 77.64 | 94.07 | 99.67 | 99.92 |
|                  | 2          | 77.40             | 75.05 | 70.55 | 73.76 | 79.58 |
|                  | 8          | 66.74             | 68.49 | 65.07 | 69.59 | 63.30 |
|                  | 24         | 54.62             | 64.09 | 62.62 | 62.87 | 54.30 |
|                  | 80         | 34.71             | 59.98 | 42.23 | 54.13 | 42.53 |
|                  | 130        | 0.00              | 55.99 | 23.72 | 47.65 | 20.28 |
| 1M NaOH          | 0          | 79.30             | 86.18 | 83.69 | 89.97 | 86.29 |
|                  | 2          | 56.19             | 83.53 | 69.66 | 73.76 | 74.95 |
|                  | 8          | 49.49             | 76.09 | 58.57 | 69.59 | 64.06 |
|                  | 24         | 26.71             | 69.29 | 47.65 | 62.87 | 51.98 |
|                  | 80         | 0.00              | 64.49 | 27.51 | 54.13 | 38.43 |
|                  | 130        | 0.00              | 55.94 | 0.00  | 47.65 | 9.35  |
| buffer pH 2.0    | 0          | 36.30             | 84.29 | 65.26 | 66.57 | 73.75 |
|                  | 2          | 6.69              | 78.40 | 49.50 | 61.91 | 54.59 |
|                  | 8          | 0.00              | 76.17 | 35.84 | 54.64 | 31.44 |
|                  | 24         | 0.00              | 71.58 | 11.19 | 47.18 | 17.01 |
|                  | 80         | 0.00              | 61.92 | 0.00  | 41.43 | 7.42  |
|                  | 130        | 0.00              | 51.89 | 0.00  | 18.88 | 0.00  |
| buffer pH 7.0    | 0          | 89.05             | 98.64 | 99.73 | 82.62 | 92.18 |
|                  | 2          | 63.79             | 92.57 | 87.96 | 78.69 | 79.64 |
|                  | 8          | 50.30             | 85.75 | 78.54 | 76.31 | 76.88 |
|                  | 24         | 42.84             | 79.36 | 63.52 | 61.71 | 58.79 |
|                  | 80         | 28.66             | 76.60 | 51.28 | 58.60 | 45.97 |
|                  | 130        | 7.06              | 70.42 | 39.71 | 51.63 | 31.80 |
| buffer pH 9.2    | 0          | 98.57             | 99.89 | 84.89 | 87.72 | 91.03 |
|                  | 2          | 85.25             | 91.91 | 71.12 | 79.24 | 81.51 |
|                  | 8          | 32.91             | 78.91 | 60.95 | 78.86 | 74.79 |
|                  | 24         | 16.90             | 76.57 | 41.95 | 75.44 | 61.60 |
|                  | 80         | 10.87             | 71.72 | 26.19 | 70.11 | 56.04 |
|                  | 130        | 0.00              | 65.63 | 12.98 | 56.11 | 44.65 |
